# Supplementary material for: Cyclodextrin-Polypyrrole Coatings of Scaffolds for Tissue Engineering
Source: PubMed Central journal article supplement (PMC6473528; doi:10.3390/polym11030459), 2019-03-11
Supplement: polymers-11-00459-s001.pdf [file polymers-11-00459-s001.pdf]

# Supplementary Materials for

## Cyclodextrin-polypyrrole coatings of scaffolds for tissue engineering

Jan Lukášek <sup>1,2</sup>, Šárka Hauzerová <sup>3</sup>, Kristýna Havlíčková <sup>3</sup>, Kateřina Strnadová <sup>3</sup>, Karel Mašek <sup>4</sup>,  
Martin Stuchlík <sup>1</sup>, Ivan Stibor <sup>1</sup>, Věra Jencová <sup>5</sup> and Michal Řezanka <sup>1,\*</sup>

- <sup>1</sup> Department of Nanomaterials in Natural Science, Institute for Nanomaterials, Advanced Technologies and Innovation, Technical University of Liberec, Studentská 1402/2, 461 17, Liberec, Czech Republic; jan.lukasek@tul.cz (J.L.); martin.stuchlik@tul.cz (M.S.); ivan.stibor@tul.cz (I.S.)
  - <sup>2</sup> Institute of New Technologies and Applied Informatics, Faculty of Mechatronics, Informatics and Interdisciplinary Studies, Technical University of Liberec, Studentská 1402/2, 461 17, Liberec, Czech Republic
  - <sup>3</sup> Department of Nonwovens and Nanofibrous Materials, Faculty of Textile Engineering, Technical University of Liberec, Studentská 1402/2, 461 17, Liberec, Czech Republic; sarka.hauzerova@tul.cz (Š.H.); kristyna.havlickova@tul.cz (K.H.); katerina.strnadova@tul.cz (K.S.)
  - <sup>4</sup> Department of Surface and Plasma Science, Faculty of Mathematics and Physics, Charles University, V Holešovičkách 2, 180 00, Prague 8, Czech Republic; karel.masek@mff.cuni.cz (K.M.)
  - <sup>5</sup> Department of Chemistry, Faculty of Science, Humanities and Education, Technical University of Liberec, Studentská 1402/2, 461 17, Liberec, Czech Republic; vera.jencova@tul.cz (V.J.)
- \* Correspondence: michal.rezanka@tul.cz (M.Ř.)

# 1. NMR spectra of 6-(pyrrol-3-yl)hexanoic acid

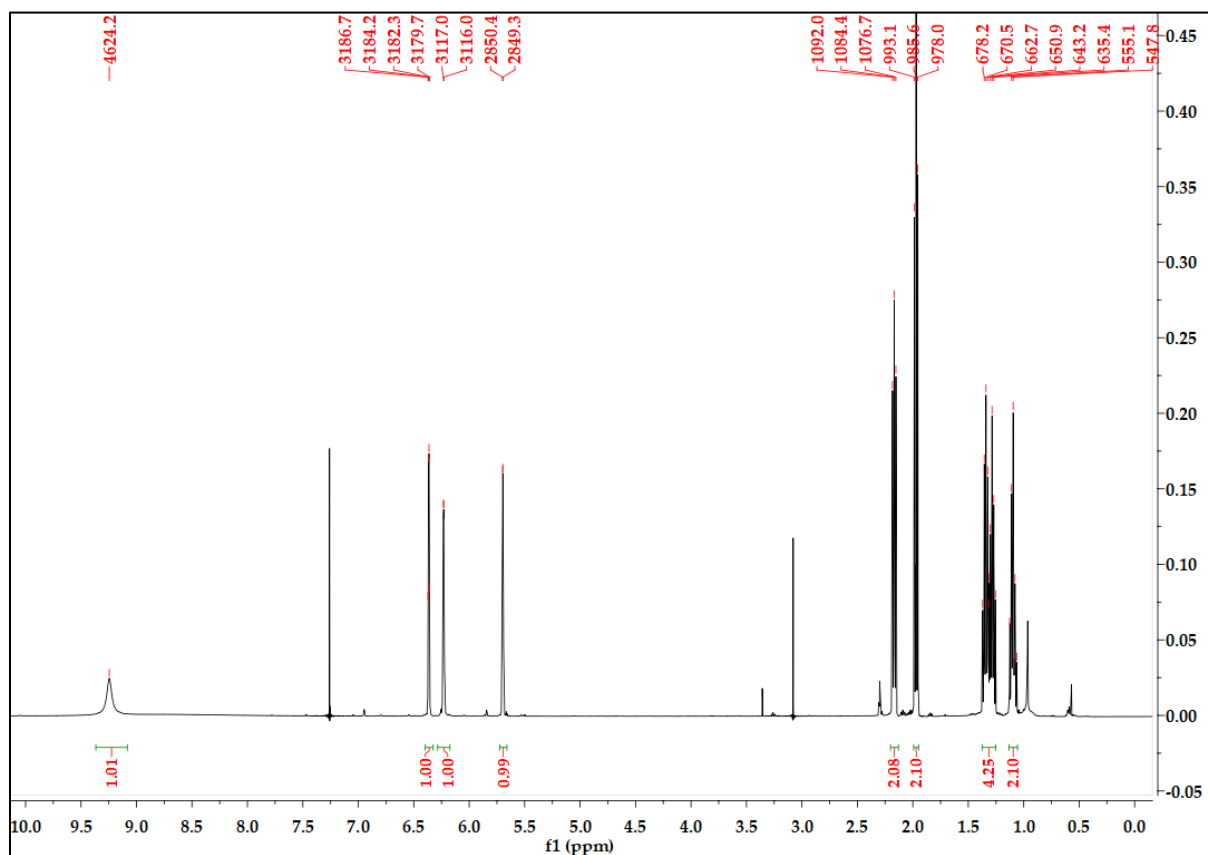

Figure S1. <sup>1</sup>H NMR spectrum (CDCl<sub>3</sub>/MeOD, 298 K, 500 MHz).

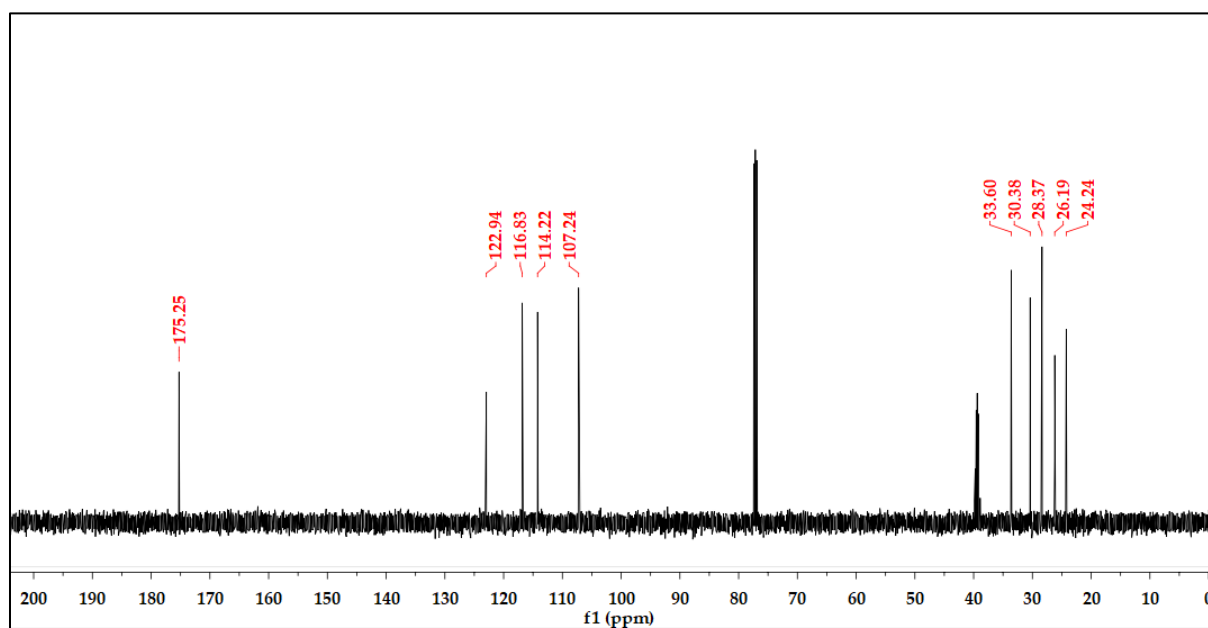

Figure S2. <sup>13</sup>C NMR spectrum (CDCl<sub>3</sub>/MeOD, 298 K, 126 MHz).

## 2. Specific surface area measurement (BET)

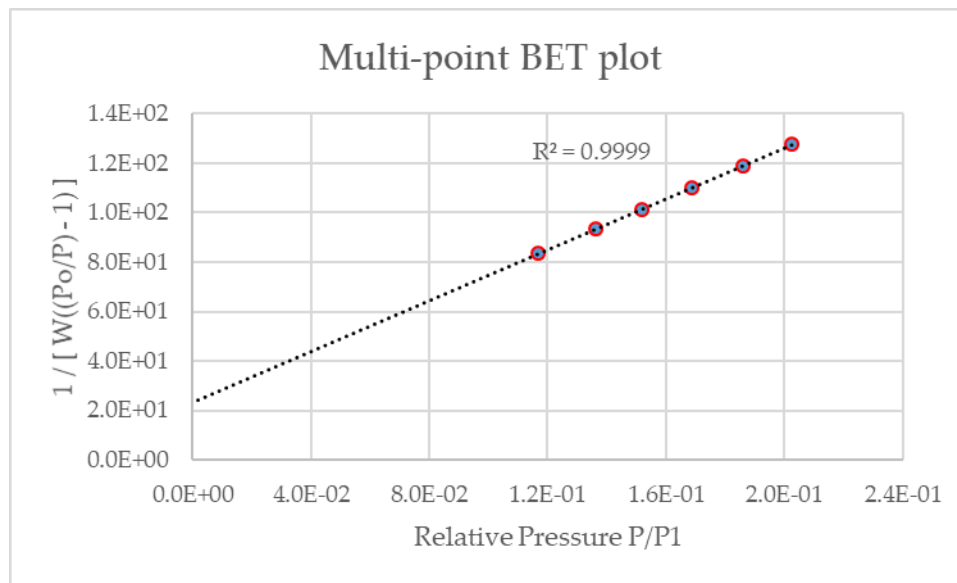

Figure S3. Multi-point BET plot.

### 3. Cell culturing

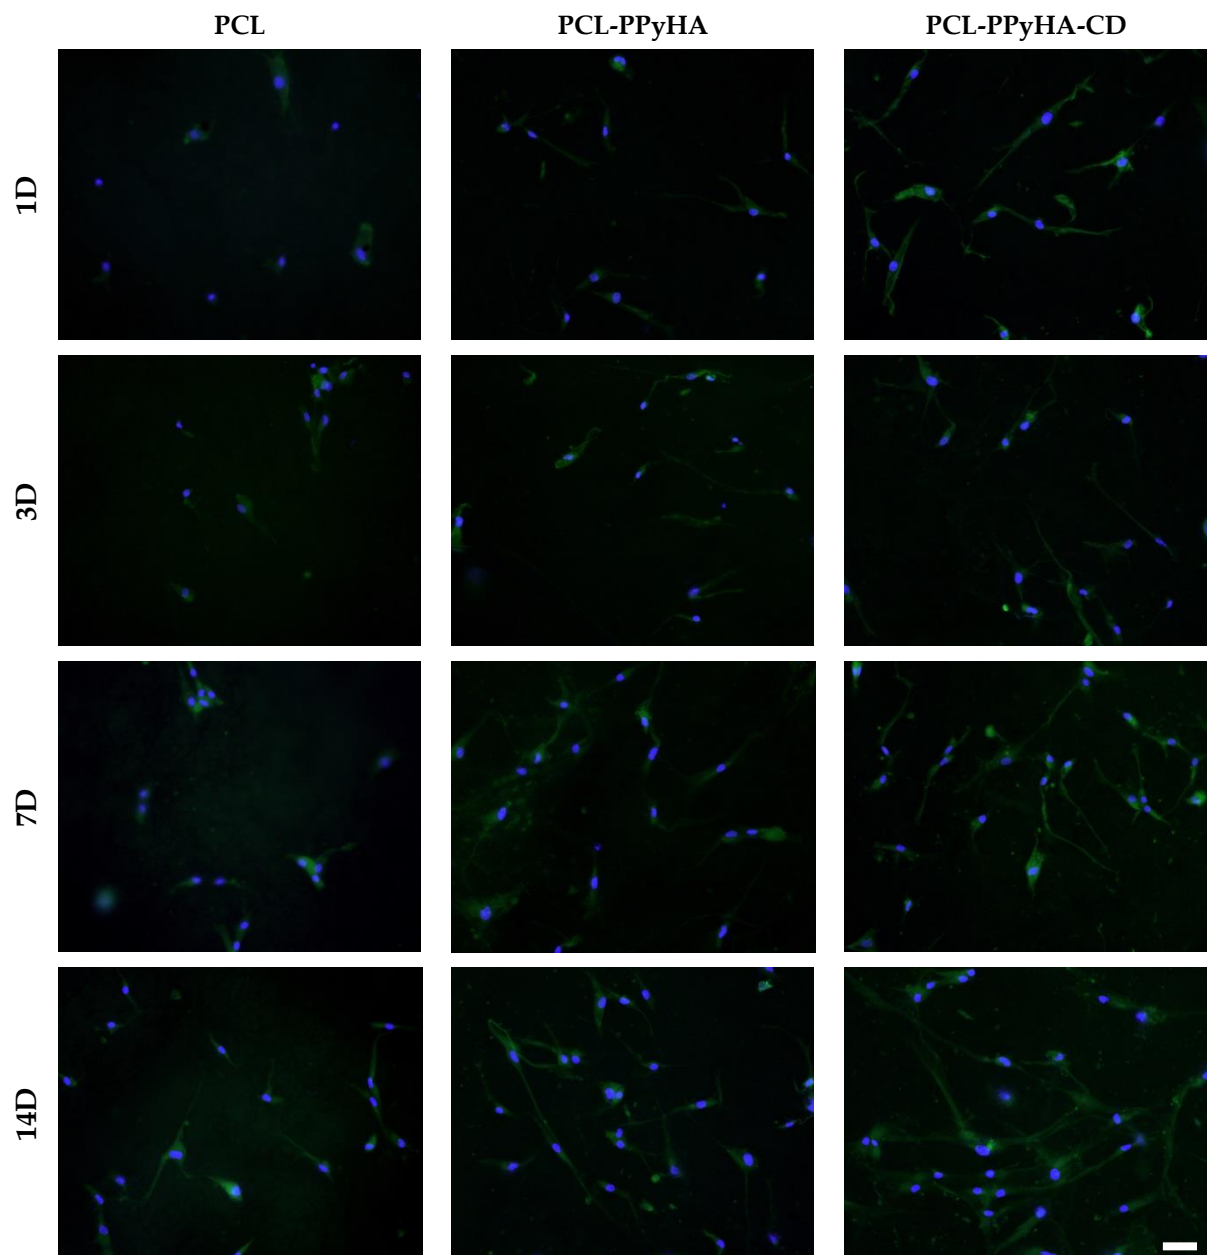

Figure S4. Fluorescent microscopy of cells seeded on PCL, PCL-PPyHA and PCL-PPyHA-CD scaffolds on days 1, 3, 7 and 14 after cell seeding. Staining: phalloidin-DAPI.

Scale bar: 50  $\mu\text{m}$ .

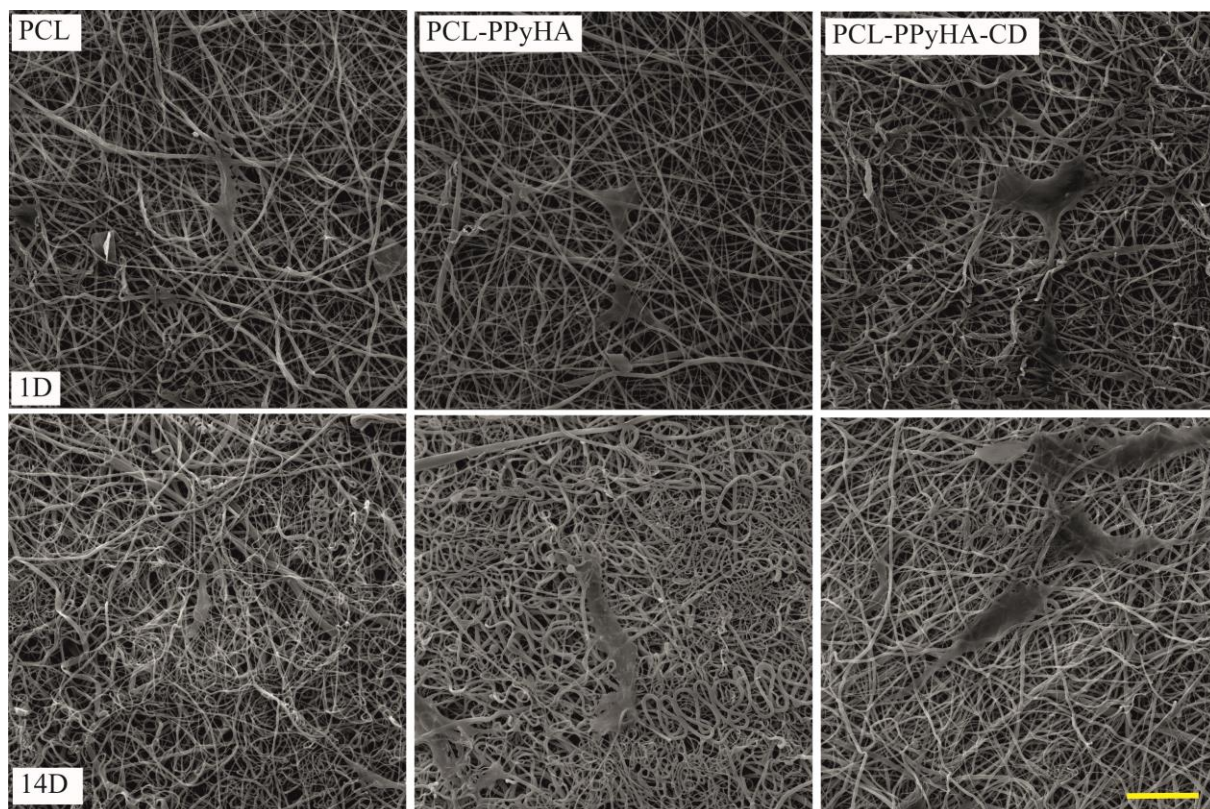

Figure S5. SEM images of the PCL, PCL-PPyHA and PCL-PPyHA-CD scaffolds on days 1 and 14 after cell seeding. Scale bar: 50  $\mu\text{m}$ .
